# Supplementary material for: A new resorufin-based spectroscopic probe for simple and sensitive detection of benzoyl peroxide via deboronation
Source: Royal Society of Chemistry journal article supplement (doi:10.1039/c2cc17768d), 2012-01-01
Supplement: c2cc17768d.pdf [file c2cc17768d.pdf]

## Electronic Supplementary Information for:

### A new resorufin-based spectroscopic probe for simple and sensitive detection of benzoyl peroxide *via* deboronation

Wei Chen, Zhao Li, Wen Shi and Huimin Ma\*

*Beijing National Laboratory for Molecular Sciences, Key Laboratory of Analytical Chemistry for Living Biosystems, Institute of Chemistry, Chinese Academy of Sciences, Beijing 100190, China. E-mail: mahm@iccas.ac.cn*

#### Reagents and apparatus

Resorufin sodium salt and benzoyl peroxide were obtained from Sigma-Aldrich, and Alfa Aesar, respectively. 2-Bromomethylphenylboronic acid pinacol ester was prepared following the reported procedure (Scrafton, et al., *J. Org. Chem.* **2008**, *73*, 2871–2874). Non-additive wheat flours and antimicrobial agent were obtained from local markets in China. Other chemicals used in this work were commercial products of analytical grade. Stock solution (1 mM) of **1** was prepared in acetonitrile. Stock solution (100  $\mu\text{g mL}^{-1}$ ) of BPO was prepared in ethanol, and stored in a refrigerator at 4 °C. Stock solutions of other substances were prepared in water. Deionized distilled water was used throughout.

$^1\text{H}$  NMR and  $^{13}\text{C}$  NMR spectra were recorded on Bruker AV-300 spectrometers with chemical shifts reported as ppm (in  $\text{CDCl}_3$ , TMS as internal standard). Electrospray ionization mass spectra (ESI-MS) were measured on an LC-MS 2010A instrument (Shimadzu, Kyoto, Japan). Fluorescence measurements were made on a Hitachi F-2500 spectrofluorimeter (Hitachi Ltd., Tokyo, Japan). Elemental analyses were carried out with a Flash EA 1112 instrument (Thermo Electron, Milan, Italy). High-performance liquid chromatography (HPLC) analyses were carried out with LC-20AT solvent delivery unit, SPD-20A UV-vis detector (Shimadzu, Japan) and Inertsil ODS-SP column (5  $\mu\text{m}$ , 4.6 mm  $\times$  250 mm, GL Sciences Inc.).

## Synthesis of **1**

To a solution of resorufin sodium salt (235 mg, 1 mmol) in DMF (10 mL) were added 2-Bromomethylphenylboronic acid pinacol ester (356.4 mg, 1.2 mmol) and  $K_2CO_3$  (207.3 mg, 1.5 mmol). The reaction mixture was stirred at room temperature overnight, followed by evaporation under reduced pressure to give a violet-red residue. The residue was purified by silica-gel column chromatography with hexane/ethyl acetate (2:1, v/v) as the eluent, affording **1** as a saffron powder (257.6 mg, yield 60%). The  $^1H$  NMR and  $^{13}C$  NMR spectra of **1** in  $CDCl_3$  are given below.  $^1H$  NMR (300 MHz,  $CDCl_3$ )  $\delta$  (ppm): 7.92 (d, 1H,  $J = 7.3$  Hz), 7.74 (d, 1H,  $J = 8.9$  Hz), 7.48 (m, 3H), 7.39 (m, 1H), 7.05 (m, 1H), 6.98 (d, 1H,  $J = 2.5$  Hz), 6.91 (d, 1H,  $J = 9.8$  Hz), 6.46 (s, 1H), 5.48 (s, 2H), 1.29 (s, 12H);  $^{13}C$  NMR (75 MHz,  $CDCl_3$ )  $\delta$  (ppm): 186.3, 163.4, 149.9, 145.7, 145.3, 141.5, 136.4, 134.7, 134.1, 131.5, 131.4, 128.4, 128.0, 127.8, 114.6, 106.6, 100.9, 83.9, 70.6, 24.9. ESI-MS:  $m/z$  430.4  $[M+H]^+$ , 452.3  $[M+Na]^+$ . Elemental analysis, calcd. for  $C_{25}H_{24}BNO_5$  (%): C 69.95, H 5.64, N 3.26; found: C 69.21, H 5.64, N 3.35.

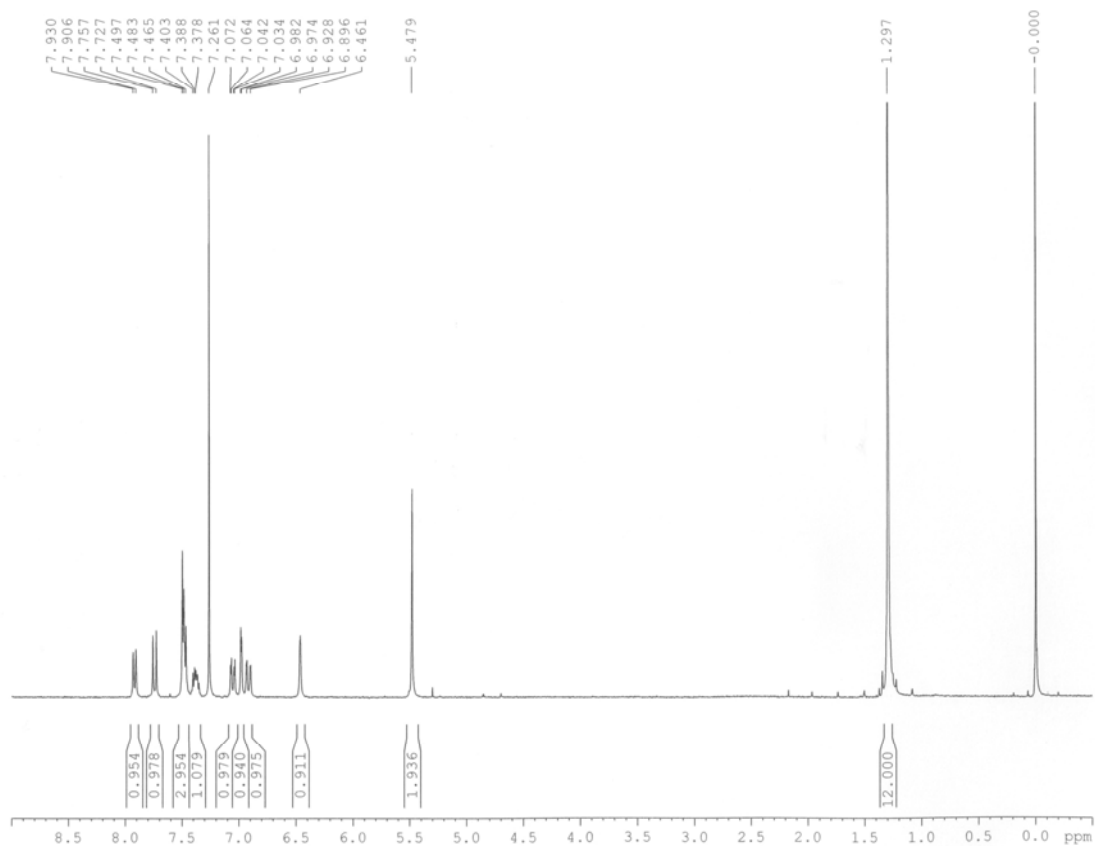

$^1H$  NMR spectrum of **1** in  $CDCl_3$

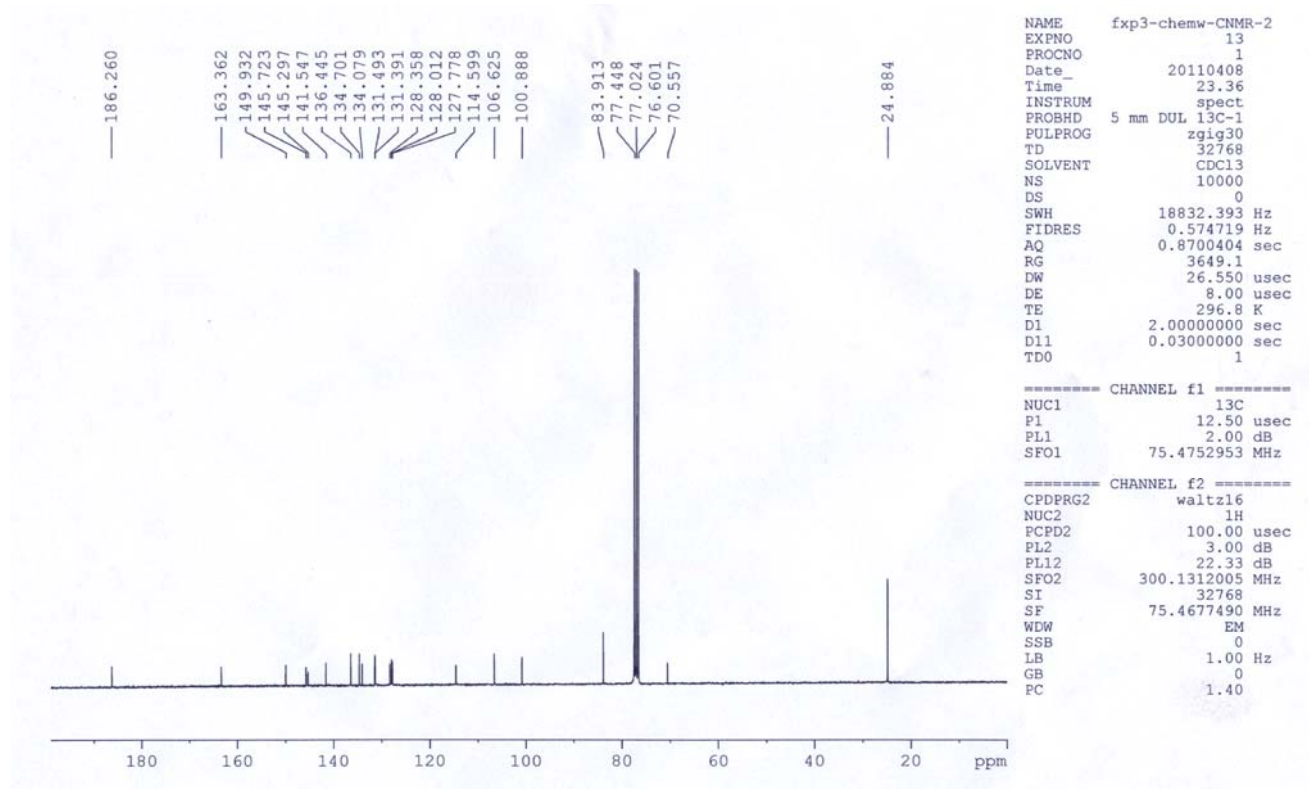

$^{13}\text{C}$  NMR spectrum of **1** in  $\text{CDCl}_3$

## General procedure for BPO detection

Unless otherwise noted, all the measurements were made in 20 mM pH 7.4  $\text{KH}_2\text{PO}_4$ - $\text{Na}_2\text{HPO}_4$  buffer containing 10% (v/v) of ethanol (referred to the phosphate buffer) according to the following procedure. In a test tube, 2.5 mL of 24 mM pH 7.4  $\text{KH}_2\text{PO}_4$ - $\text{Na}_2\text{HPO}_4$  buffer and 9  $\mu\text{L}$  of the stock solution of **1** were mixed, followed by addition of a requisite volume of BPO sample solution. The final volume of the reaction solution was adjusted to 3 mL with an appropriate volume of ethanol or water, letting the concentration of ethanol to be 10% (v/v). After mixing and then standing for 15 min at room temperature, a 3-mL portion of the reaction solution was transferred into a 1-cm quartz cell to measure absorbance and fluorescence with  $\lambda_{\text{ex/em}} = 550/585$  nm and both excitation and emission slit widths of 10 nm. In the meantime, a blank solution containing no BPO was prepared and measured under the same conditions for comparison.

## Sample preparation

The samples were prepared by mixing wheat flour (1 g) or gel-like antimicrobial agent (1 g)

with ethanol (5 mL) containing appropriate amounts of BPO in a tube. The sample was then sonicated for 2 min. After standing for 1 min, the sample was filtered through a disk filter (pore size: 0.45  $\mu\text{m}$ ), and 0.3 mL of the filtrate was subjected to the fluorescence analysis following the general procedure given above.

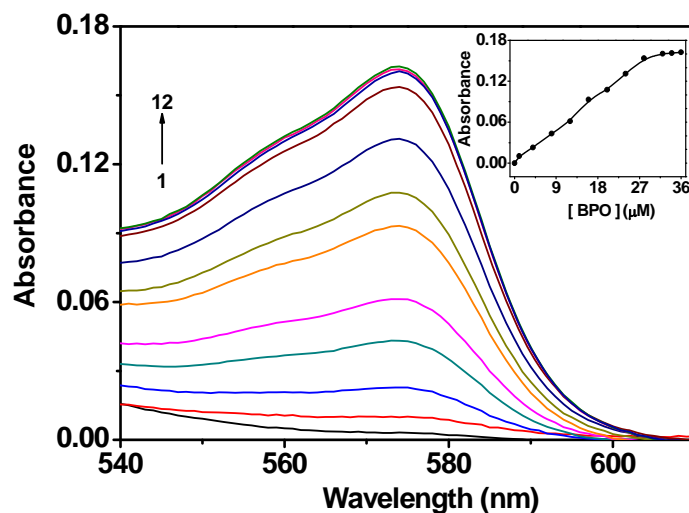

**Fig. S1.** UV-vis spectra of **1** (3  $\mu\text{M}$ ) reacting with varied concentrations of BPO (0, 1, 4, 8, 12, 16, 20, 24, 28, 32, 34, 36  $\mu\text{M}$  of BPO for curves 1-12, respectively). The reactions were carried out for 15 min at room temperature in 20 mM pH 7.4 phosphate buffer.

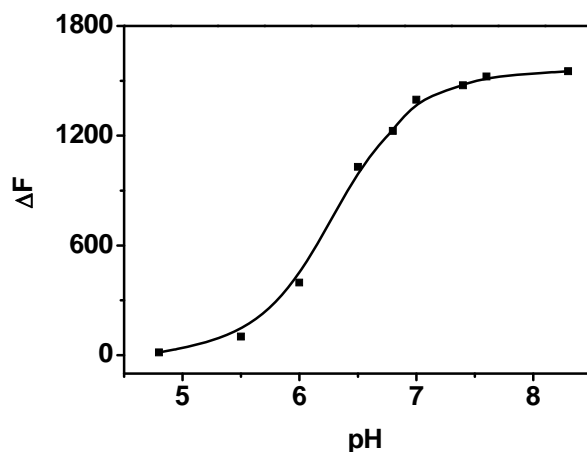

**Fig. S2.** Effect of pH on the fluorescence increase value ( $\Delta F$ ) of **1** (3  $\mu\text{M}$ ) with BPO (30  $\mu\text{M}$ ). The reactions were carried out for 15 min at room temperature in the phosphate buffer with different pH values.  $\Delta F = F - F_0$ , where  $F_0$  and  $F$  are the fluorescence intensity before and after the addition of BPO, respectively.

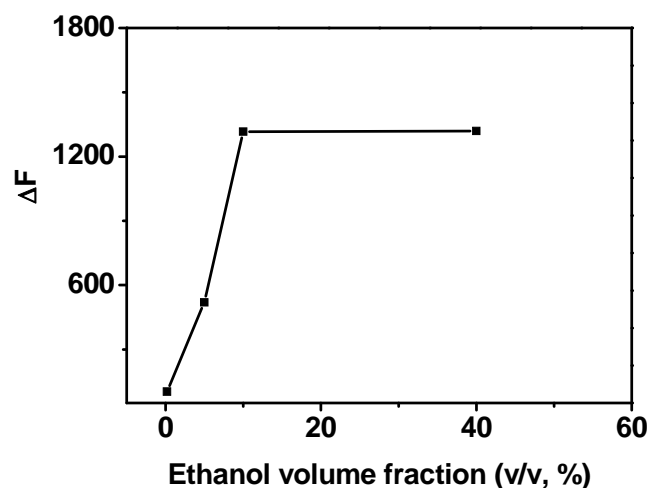

**Fig. S3.** Effect of ethanol volume fraction in pH 7.4 phosphate buffer on the fluorescence increase value ( $\Delta F$ ) of **1** ( $3 \mu\text{M}$ ) with BPO ( $30 \mu\text{M}$ ). The reactions were carried out for 15 min at room temperature in the phosphate buffer (a higher concentration of ethanol may lead to the precipitation of the phosphate buffer).

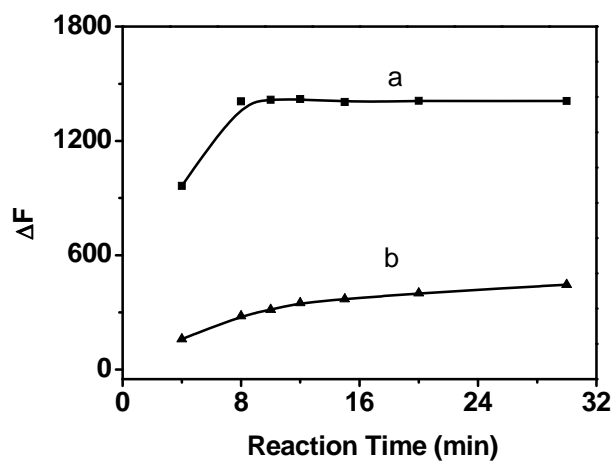

**Fig. S4.** Effect of reaction time on the fluorescence increase value ( $\Delta F$ ) of **1** ( $3 \mu\text{M}$ ) reacting with  $30 \mu\text{M}$  of BPO (curve a) and  $\text{H}_2\text{O}_2$  (curve b). The reactions were carried out at room temperature in 20 mM pH 7.4 phosphate buffer.

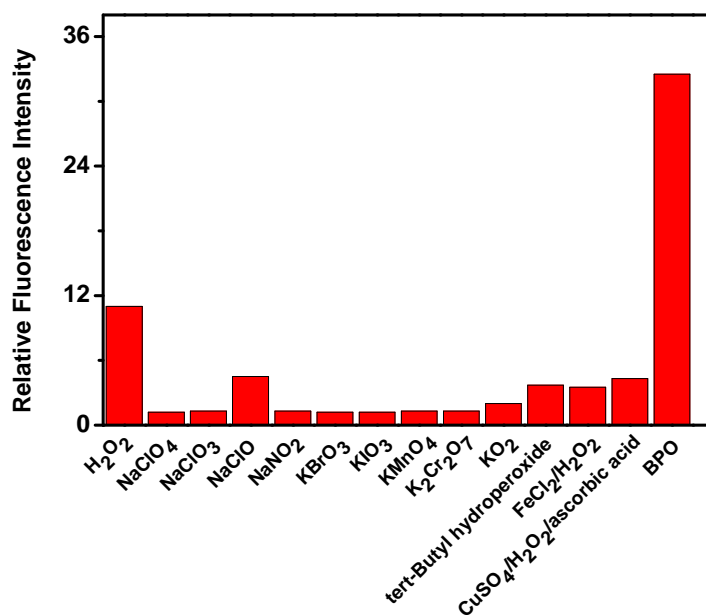

**Fig. S5.** The relative fluorescence intensity ( $F/F_0$ ) of **1** (3  $\mu$ M) reacting with different oxidants (30  $\mu$ M). The reactions were carried out for 15 min at room temperature in 20 mM pH 7.4 phosphate buffer.

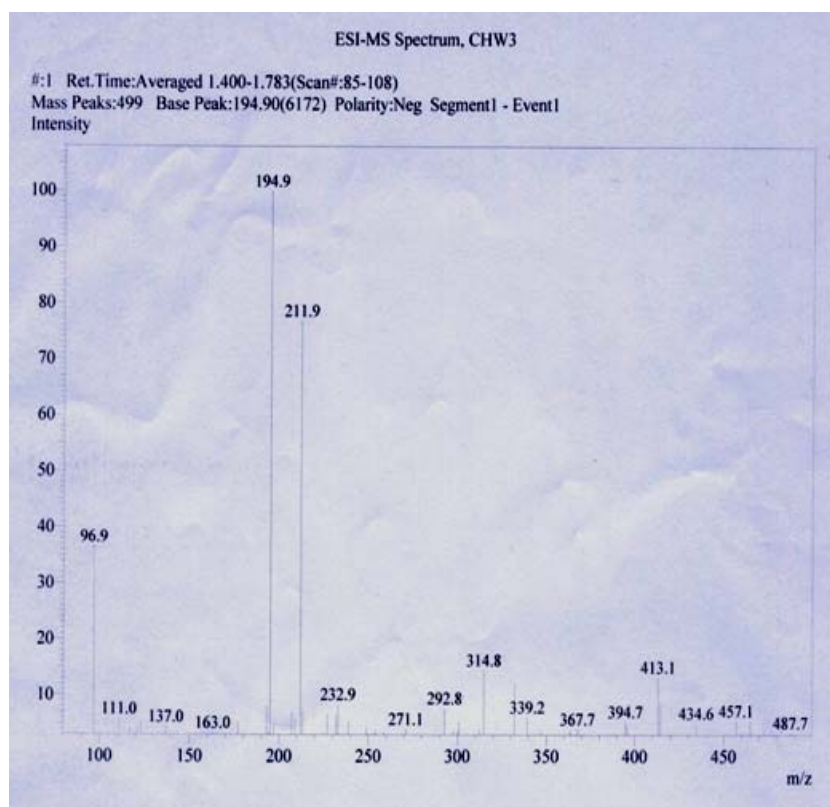

**Fig. S6.** ESI-MS spectrum of the reaction solution of **1** (100  $\mu$ M) with BPO (200  $\mu$ M).

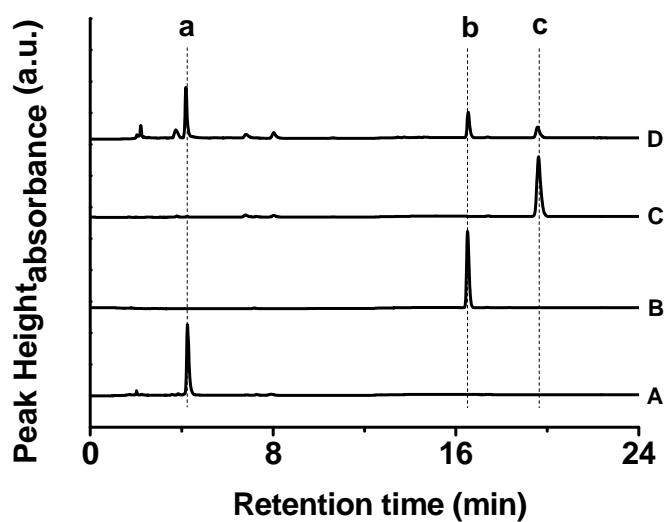

**Fig. S7.** HPLC chromatograms of different reaction systems in the phosphate buffer. (A) 100  $\mu\text{M}$  resorufin; (B) 200  $\mu\text{M}$  BPO; (C) 100  $\mu\text{M}$  **1**; (D) 100  $\mu\text{M}$  **1** + 200  $\mu\text{M}$  BPO. The assignment of the peaks: (a) 4.20 min, resorufin; (b) 16.51 min, BPO; (c) 19.60 min, probe **1**.

**Table S1.** Recovery of BPO (15  $\mu\text{M}$ ) in the presence of various coexisting species

| Species                             | Concentration<br>( $\mu\text{M}$ ) | Molar ratio of the added<br>species to BPO | Recovery (%) |
|-------------------------------------|------------------------------------|--------------------------------------------|--------------|
| NaCl                                | 15000                              | 1000                                       | 97.6         |
| KNO <sub>3</sub>                    | 15000                              | 1000                                       | 98.3         |
| CaCl <sub>2</sub> <sup>[a]</sup>    | 30                                 | 2                                          | 96.5         |
| MgCl <sub>2</sub> <sup>[a]</sup>    | 30                                 | 2                                          | 97.5         |
| NaClO <sub>3</sub>                  | 1500                               | 100                                        | 102.8        |
| KBrO <sub>3</sub>                   | 1500                               | 100                                        | 96.6         |
| KIO <sub>3</sub>                    | 1500                               | 100                                        | 95.0         |
| NaClO <sub>4</sub>                  | 1500                               | 100                                        | 99.8         |
| NaNO <sub>2</sub>                   | 1500                               | 100                                        | 95.7         |
| NaF                                 | 1500                               | 100                                        | 96.8         |
| NaBr                                | 1500                               | 100                                        | 101          |
| NaI                                 | 1500                               | 100                                        | 100.7        |
| ZnSO <sub>4</sub> <sup>[a]</sup>    | 30                                 | 2                                          | 96.4         |
| CuCl <sub>2</sub> <sup>[a]</sup>    | 30                                 | 2                                          | 99.9         |
| Pb(AcO) <sub>2</sub> <sup>[a]</sup> | 30                                 | 2                                          | 97.2         |
| FeCl <sub>2</sub> <sup>[a]</sup>    | 30                                 | 2                                          | 101.1        |
| FeCl <sub>3</sub> <sup>[a]</sup>    | 30                                 | 2                                          | 98.9         |
| CrCl <sub>3</sub> <sup>[a]</sup>    | 30                                 | 2                                          | 100.9        |
| CoCl <sub>2</sub> <sup>[a]</sup>    | 30                                 | 2                                          | 101          |
| NiCl <sub>2</sub> <sup>[a]</sup>    | 30                                 | 2                                          | 97.3         |
| CdCl <sub>2</sub> <sup>[a]</sup>    | 30                                 | 2                                          | 97           |
| Glucose                             | 1500                               | 100                                        | 99.6         |
| Fructose                            | 1500                               | 100                                        | 97.6         |
| Maltose                             | 1500                               | 100                                        | 103.6        |
| Arginine                            | 1500                               | 100                                        | 97.5         |
| Serine                              | 1500                               | 100                                        | 102.2        |
| Glycine                             | 1500                               | 100                                        | 103.4        |
| Vitamin B <sub>1</sub>              | 1500                               | 100                                        | 96.2         |
| Vitamin B <sub>6</sub>              | 1500                               | 100                                        | 99.9         |
| Vitamin C                           | 1500                               | 100                                        | 101.7        |
| Carbopol                            | 7500                               | 500                                        | 97.4         |

<sup>[a]</sup> Higher concentrations of these species led to the precipitation of metal salts.



**Table S2.** Determination of BPO content in wheat flour and antimicrobial agent

| Sample                | BPO added<br>(mg kg <sup>-1</sup> ) | BPO found by proposed<br>method <sup>a</sup> (mg kg <sup>-1</sup> ) | Recovery (%) |
|-----------------------|-------------------------------------|---------------------------------------------------------------------|--------------|
| Wheat flour A         | 0                                   | < 0.28 (detection limit) <sup>b</sup>                               | –            |
| Wheat flour B         | 50                                  | 51.4 ± 1.0                                                          | 102.8 ± 1.9  |
| Wheat flour C         | 100                                 | 103.0 ± 1.7                                                         | 103.0 ± 1.7  |
| Wheat flour D         | 200                                 | 197.1 ± 7.6                                                         | 98.7 ± 3.7   |
| Antimicrobial agent A | 0                                   | < 0.28 (detection limit) <sup>b</sup>                               | –            |
| Antimicrobial agent B | 50                                  | 49.8 ± 2.2                                                          | 99.4 ± 4.3   |
| Antimicrobial agent C | 100                                 | 98.4 ± 2.3                                                          | 98.4 ± 2.3   |
| Antimicrobial agent D | 200                                 | 200.4 ± 3.1                                                         | 100.2 ± 1.5  |

<sup>a</sup> Mean of three determinations ± standard deviation.

<sup>b</sup> In this method the detection limit of 23 nM BPO corresponds to 0.28 mg kg<sup>-1</sup>.
